# Supplementary material
Source: PubMed Central journal article supplement (PMC2206604)
Supplement: pnas_0711018105_1.pdf [file pnas_0711018105_1.pdf]

B0205.3 (*rpn-10*)  
 B0414.8  
 C04E6.5  
 C08B11.7 (*ubh-4*)  
 C10G11.8  
 C16C8.11  
 C16C8.12  
 C16C8.14  
 C16C8.4  
 C16C8.5  
 C26F1.4 (*rps-30*)  
 C34F6.9  
 C44B7.1  
 C47B2.4 (*pbs-2*)  
 C52E4.4 (*rpl-1*)  
 F07A11.4  
 F10G7.8 (*rpn-5*)  
 F15C11.2  
 F29C4.5 (*duo-2*)  
 F30A10.10  
 F35B3.1  
 F35G12.12  
 F37B12.4  
 F38B7.5 (*duo-1*)

F45H11.2 (*ned-8*)  
 F46F11.4 (*ubl-5*)  
 F49C12.9  
 F52C6.2  
 F52C6.3  
 F52C6.4 (*math-32*)  
 F56G4.2 (*pes-2*)  
 F59B2.5  
 F59E12.6  
 H19N07.2 (*math-33*)  
 H34C03.2  
 K02C4.3  
 K08B4.5  
 K08A9.4  
 R10E11.3  
 T05H10.1  
 T06D8.8 (*rpn-9*)  
 T06G6.4  
 T22F3.2  
 T27A3.2  
 Y53C12B.2  
 Y54E10BR.4  
 ZK1236.7  
 ZK688.5

C06A5.4  
 C14A4.4 (*crn-3*)  
 C17G10.1  
 C53A5.2  
 D2030.8  
 R11A5.1 (*apb-3*)  
 T10F2.3 (*ulp-1*)  
 T16H12.2  
 W03F8.4  
 ZC395.2 (*clk-1*)  
 ZC97.1 (*tag-354*)  
 ZK418.4 (*lin-37*)  
 ZK652.9 (*coq-5*)

C01G10.12 (*dj-3*)  
 F56G4.5 (*png-1*)  
 C18E9.10  
 C27F2.5  
 C47B2.2  
 T09E8.3  
 Y55D9A.2  
 K11G12.4 (*smf-1*)  
 R05D11.6  
 F26E4.11 (*hrdl-1*)  
 B0035.2 (*dj-2*)

UPS

**Key**

Homologs of human PD genes

- negative in RNAi screen
- ◐ positive in primary RNAi screen
- ◑ positive in secondary RNAi screen

Gene IDs

- negative in RNAi screen
- ◐ positive in primary RNAi screen
- ◑ positive in secondary RNAi screen

Lines

- black = co-expressed via microarray
- - - black dotted = interactome data
- colored = associated with process

Cellular processes

- ERAD
- UPS
- autophagy
- UPR
- yeast  $\alpha$ -syn toxicity gene

Color coded

C48D5.1 (NHR-6)

T01C8.1 (*aak-2*)

B0432.2 (DJ-1)

EED8.9 (PINK1)

F46E10.8 (UCHL1)

T27C10.6 (LRK-1)

Y65B4BR.4 (*wwp-1*)

F32A6.3 (*vps-41*)

B0025.1 (*vps-34*)

ZC155.7 (*syn-16*)

autophagy

ZC518.2 (*sec-24.2*)

yeast  $\alpha$ -syn toxicity gene

K08E3.7 (parkin)

UPR

M7.5 (*algr-7*)

F55A11.3 (*hrd-1*)  
C35B1.1 (*ubc-1*)

T04G9.3 (*ile-2*)  
F36H1.1 (*ftb-1*)  
F39B2.10 (*dj-12*)

F53C3.13  
Y54E10BR.2

ERAD

B0403.4 (*tag-320*)  
C15H9.6 (*hsp-3*)  
H06O01.1 (*pdi-3*)

K02G10.8 (*dj-14*)  
T03G11.4  
T14G8.3

F57F5.5 (*pkc-1*)  
ZK593.6 (*lgg-2*)

W08D2.5 (PARK9)

C34D4.14  
F26G5.9 (*tam-1*)  
D1022.1 (*ubc-6*)

Y54E10BR.1

F57B10.11 (*bag-1*)  
F43E2.8 (*hsp-4*)

C16C8.13  
F21C3.3 (*tag-202*)

ZK20.5 (*rpn-12*)  
Y106G6H.12 (*duo-3*)

F37A4.5  
Y40G12A.1 (*ubh-3*)  
Y59ARB.2

Y37A1B.13 (*tor-2*)

$\alpha$ -syn proteomics

C12C8.1 (*hsp-70*)  
F44E5.4  
F44E5.5  
F52D10.3 (*ftt-2*)  
F54C9.2 (*stc-1*)  
M117.3  
Y38A10A.5 (*crf-1*)
