# Supplementary material
Source: PubMed Central journal article supplement (PMC2206604)
Supplement: pnas_0711018105_4.pdf [file pnas_0711018105_4.pdf]

**PRIMERS***cdk-5* $\alpha$ -syn**FLAG + clone  
specific****WORM  
STRAIN**N2  
 $\alpha$ -syn  
Tg line 1  
Tg line 2  
Tg line 3N2  
 $\alpha$ -syn  
Tg line 1  
Tg line 2  
Tg line 3N2  
 $\alpha$ -syn  
Tg line 1  
Tg line 2  
Tg line 3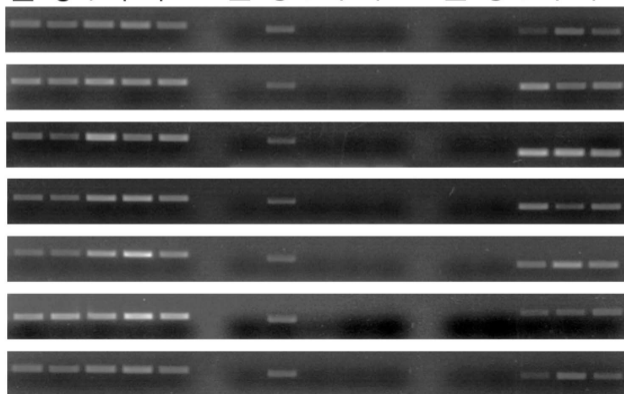**C35D10.2****C54H2.5****F16A11.2****F32A6.3****F55A4.1****M7.5****R05D11.6**
