# Supplementary material
Source: PubMed Central journal article supplement (PMC2206604)
Supplement: pnas_0711018105_6.pdf [file pnas_0711018105_6.pdf]

**Table 4. A summary of RNAi knockdown of the top 20 gene candidates in worms expressing Q82::GFP + TOR-2 in body wall muscle cells**

| <i>C. elegans</i> gene ID of targeted gene | Average number $\pm$ SD of aggregates per worm* <sup>†</sup> |
|--------------------------------------------|--------------------------------------------------------------|
| None (Q82::GFP + TOR-2)                    | 35.3 $\pm$ 5.5                                               |
| B0432.2 ( <i>djr-1.1</i> )                 | 38.6 $\pm$ 6.1                                               |
| T05C3.5 ( <i>dnj-19</i> )                  | 34.5 $\pm$ 5.5                                               |
| C35D10.2                                   | 35.8 $\pm$ 6.7                                               |
| C54H2.5 ( <i>sft-4</i> )                   | 35.7 $\pm$ 4.9                                               |
| EEED8.9 ( <i>pink-1</i> )                  | 37.3 $\pm$ 7.6                                               |
| F11H8.1 ( <i>rfl-1</i> )                   | 35.9 $\pm$ 7.4                                               |
| F16A11.2                                   | 39.2 $\pm$ 7.2                                               |
| F26E4.11 ( <i>hrdl-1</i> )                 | 38.1 $\pm$ 5.3                                               |
| F32A6.3 ( <i>vps-41</i> )                  | 37.8 $\pm$ 7.0                                               |
| F48E3.7 ( <i>acr-22</i> )                  | 36.4 $\pm$ 8.7                                               |
| F55A4.1                                    | 35.6 $\pm$ 6.2                                               |
| F57B10.5                                   | 36.2 $\pm$ 6.2                                               |
| F59F4.1                                    | 36.2 $\pm$ 5.8                                               |
| K11G12.4 ( <i>smf-1</i> )                  | 37.4 $\pm$ 4.2                                               |
| M7.5 ( <i>atgr-7</i> )                     | 38.5 $\pm$ 5.2                                               |
| R05D11.6                                   | 36.4 $\pm$ 6.6                                               |
| T07F12.4                                   | 36.1 $\pm$ 5.7                                               |
| T08D2.4                                    | 37.9 $\pm$ 4.4                                               |
| T13A10.2                                   | 36.1 $\pm$ 6.0                                               |
| Y37A1B.13 ( <i>tor-2</i> )                 | 52.0 $\pm$ 9.9 ( $P < 0.01$ ) <sup>‡</sup>                   |

\*Two separate RNAi experiments were performed for each gene target ( $n = 20$  for each RNAi round).

<sup>†</sup>Knockdown of *tor-2* resulted in a significant increase in aggregate number, whereas the depletion of other gene products did not enhance aggregation.
