# Supplementary material
Source: PubMed Central journal article supplement (PMC2206604)
Supplement: pnas_0711018105_7.pdf [file pnas_0711018105_7.pdf]

**Table 5. Bioinformatic associations among gene candidates identified by RNAi**

| <i>C. elegans</i> gene ID  | Association       | Component of:     |
|----------------------------|-------------------|-------------------|
| K11G12.4 ( <i>smf-1</i> )  | PINK1 and DJ-1 *  |                   |
| R05D11.6                   | PINK1 and DJ-1 *  |                   |
| F26E4.11 ( <i>hrdl-1</i> ) | PINK1 and DJ-1 *  | ERAD              |
| C35D10.2                   | DJ-1 <sup>†</sup> | Autophagy         |
| M7.5 ( <i>atgr-7</i> )     |                   | UPS and autophagy |
| F32A6.3 ( <i>vps-41</i> )  | UCHL-1 *          | UPS and autophagy |

\*Coexpressed in microarray topology map, as per Kim *et al.* (1).

<sup>†</sup>Identified within same protein interactome network, as per Li *et al.* (2).

1. Kim SK, *et al.* (2001) A gene expression map for *Caenorhabditis elegans*. *Science* 293:2087-2092.
2. Li S, *et al.* (2004) A map of the interactome network of the metazoan *C. elegans*. *Science* 303:540-543.
