# Supplementary material
Source: PubMed Central journal article supplement (PMC2206604)

**A**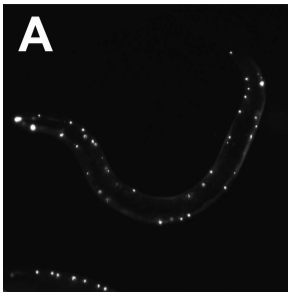**B**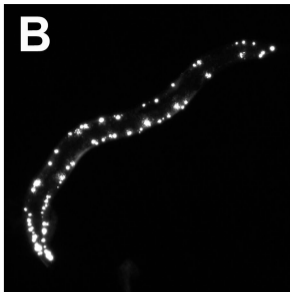**C**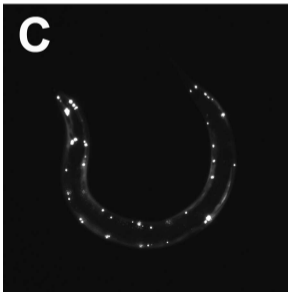**D**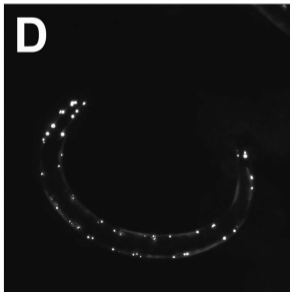

Supplement: pnas_0711018105_2.pdf [file pnas_0711018105_2.pdf]

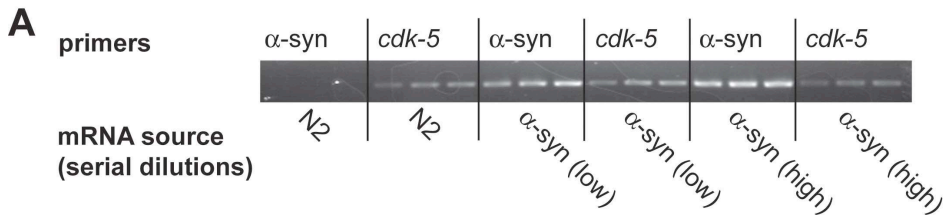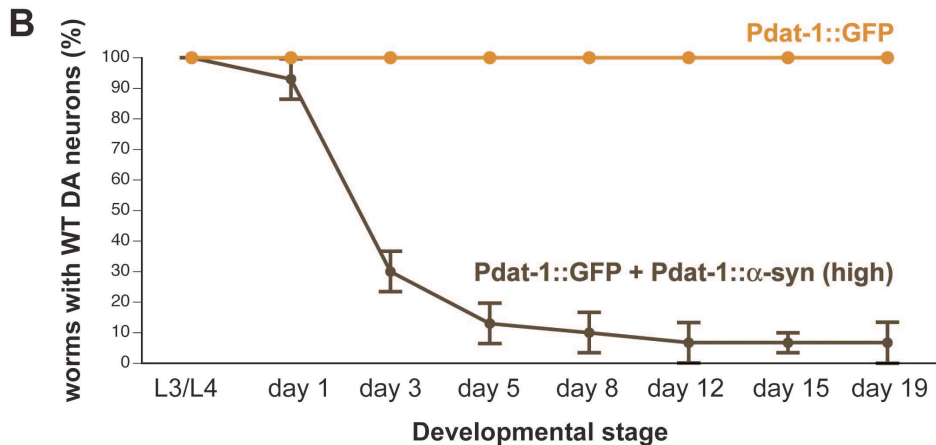

Supplement: pnas_0711018105_3.pdf [file pnas_0711018105_3.pdf]

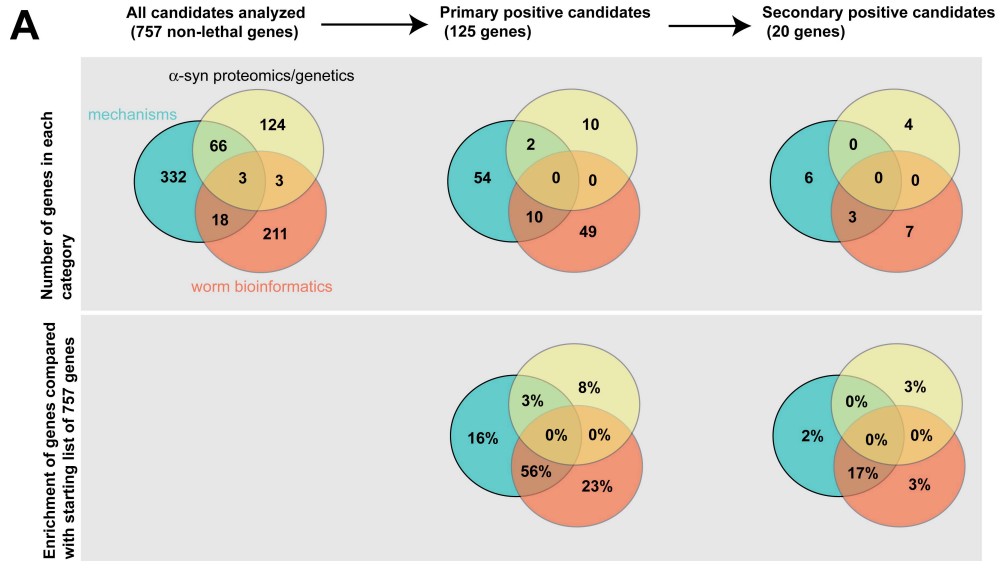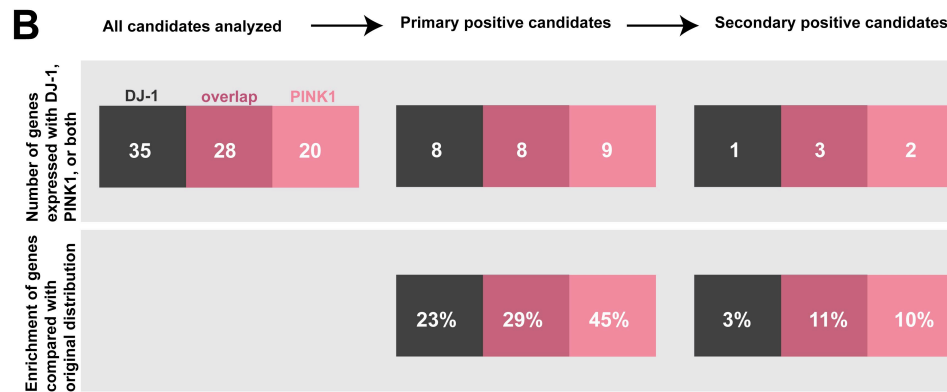

Supplement: pnas_0711018105_5.pdf [file pnas_0711018105_5.pdf]
